# Supplementary material for: Effects of oxygen vacancies on the electrochemical performance of tin oxide
Source: Royal Society of Chemistry journal article supplement (doi:10.1039/c2ta01012g), 2012-12-11
Supplement: c2ta01012g.pdf [file c2ta01012g.pdf]

## Electronic Supplementary Information (ESI)

### Effect of Oxygen Vacancies on the Electrochemical Performance of Tin Oxide

Na Li<sup>a,b</sup>, Kui Du<sup>a</sup>, Gang Liu<sup>a</sup>, Ying Peng Xie<sup>a</sup>, Guang Min Zhou<sup>a</sup>, Jing Zhu<sup>c</sup>,  
FengLi<sup>a,\*</sup> and Hui-Ming Cheng<sup>a</sup>

<sup>a</sup> Shenyang National Laboratory for Materials Science, Institute of Metal Research,  
Chinese Academy of Sciences, 72 Wenhua Road, Shenyang 110016, China

<sup>b</sup> Department of Materials Science & Engineering, School of Chemistry and Materials  
Science, University of Science and Technology of China, Hefei 230026, China

<sup>c</sup> Beijing National Center for Electron Microscopy, Tsinghua University, Beijing  
100084, China

Fax: (+86) 24-2390-3126

E-mail: [fli@imr.ac.cn](mailto:fli@imr.ac.cn) (FL)

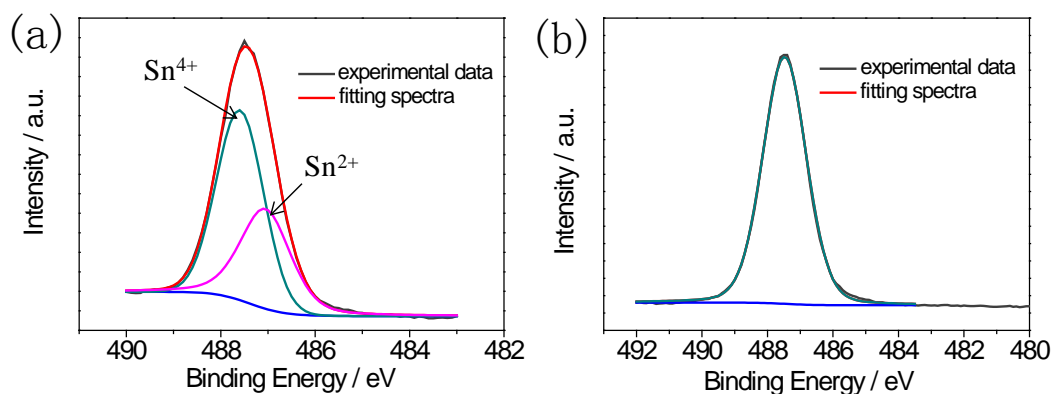

Fig. S1 High-resolution XPS spectra of Sn 3d for (a)  $\text{SnO}_{2-\delta}$  and (b)  $\text{SnO}_2$ .

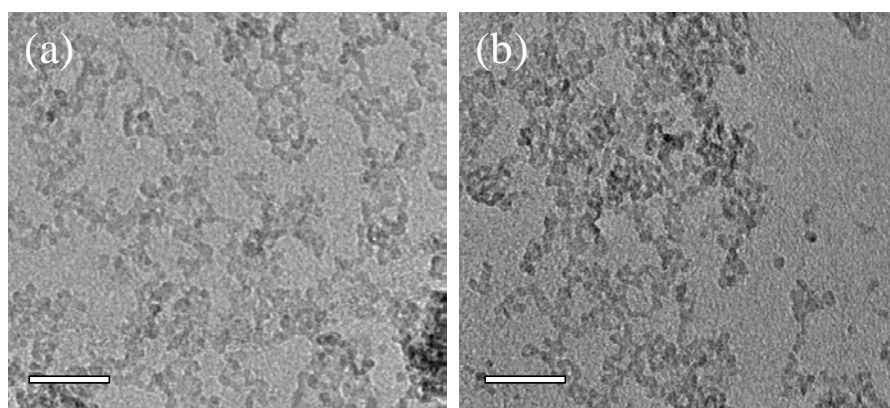

Fig. S2 TEM images of (a)  $\text{SnO}_{2-\delta}$  nanoparticles and (b)  $\text{SnO}_2$  nanoparticles. Scale bar: 20 nm.

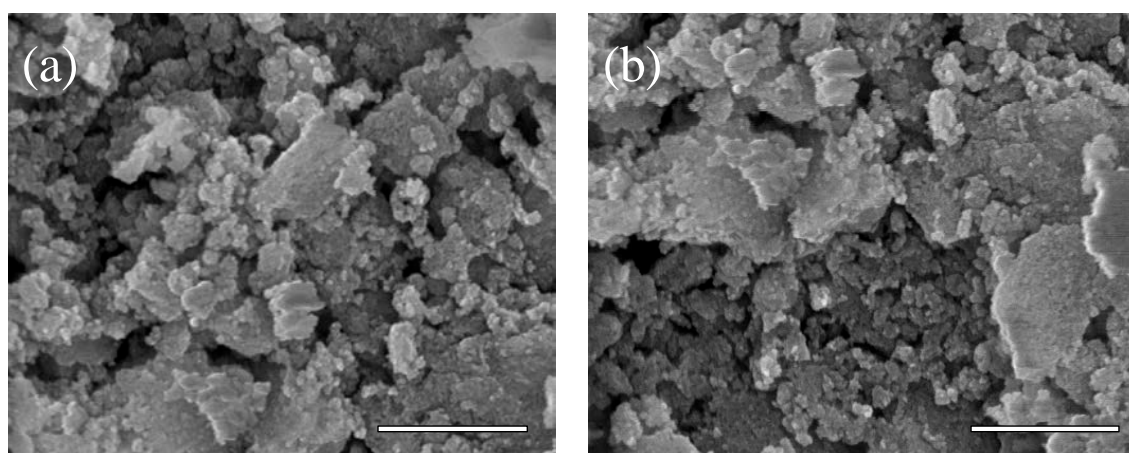

Fig. S3 SEM images of (a)  $\text{SnO}_{2-\delta}$  nanoparticles and (b)  $\text{SnO}_2$  nanoparticles. Scale bar: 500 nm.
